# Supplementary material for: Tumor Chemo-Radiotherapy with Rod-Shaped and Spherical Gold Nano Probes: Shape and Active Targeting Both Matter
Source: PubMed Central journal article supplement — Theranostics. 2019 Mar 16;9(7):1893–908. doi: 10.7150/thno.30523 (PMC6485290; doi:10.7150/thno.30523), 2019-03-16
Supplement: thnov09p1893s1.pdf [file thnov09p1893s1.pdf]

## Supporting information

### **Tumor chemo-radiotherapy with rod-shaped and spherical gold nano probes: shape and active targeting both matter**

Lu Zhang<sup>1</sup>, Huilan Su<sup>2</sup>, Haolu Wang<sup>3</sup>, Qian Li<sup>1</sup>, Xiao Li<sup>4</sup>, Chuanqing Zhou<sup>1</sup>, Jia Xu<sup>1</sup>,  
Yimin Chai<sup>1</sup>, Xiaowen Liang<sup>3,\*</sup>, Liqin Xiong<sup>1</sup> and Chunfu Zhang<sup>1,5,\*</sup>

1. Shanghai Jiao Tong University Affiliated 6th Hospital, School of Biomedical Engineering, Shanghai Jiao Tong University, Shanghai 200030, China
2. State Key Laboratory of Metal Matrix Composites, School of Materials Science and Engineering, Shanghai Jiao Tong University, Shanghai 200240, China
3. The University of Queensland Diamantina Institute, The University of Queensland, Woolloongabba, QLD 4102, Australia
4. Department of Nuclear Medicine, Changhai Hospital, The Secondary Military Medical University, Shanghai 200433, China
5. Department of Nuclear Medicine, Rui Jin Hospital, School of Medicine, Shanghai Jiao Tong University, Shanghai 200025, China

\* Corresponding to Chunfu Zhang and Xiaowen Liang:

E-mail: cfzhang@sjtu.edu.cn. Tel.: +86-21-62933323.

x.liang@uq.edu.au Tel.: +61-07-34437488

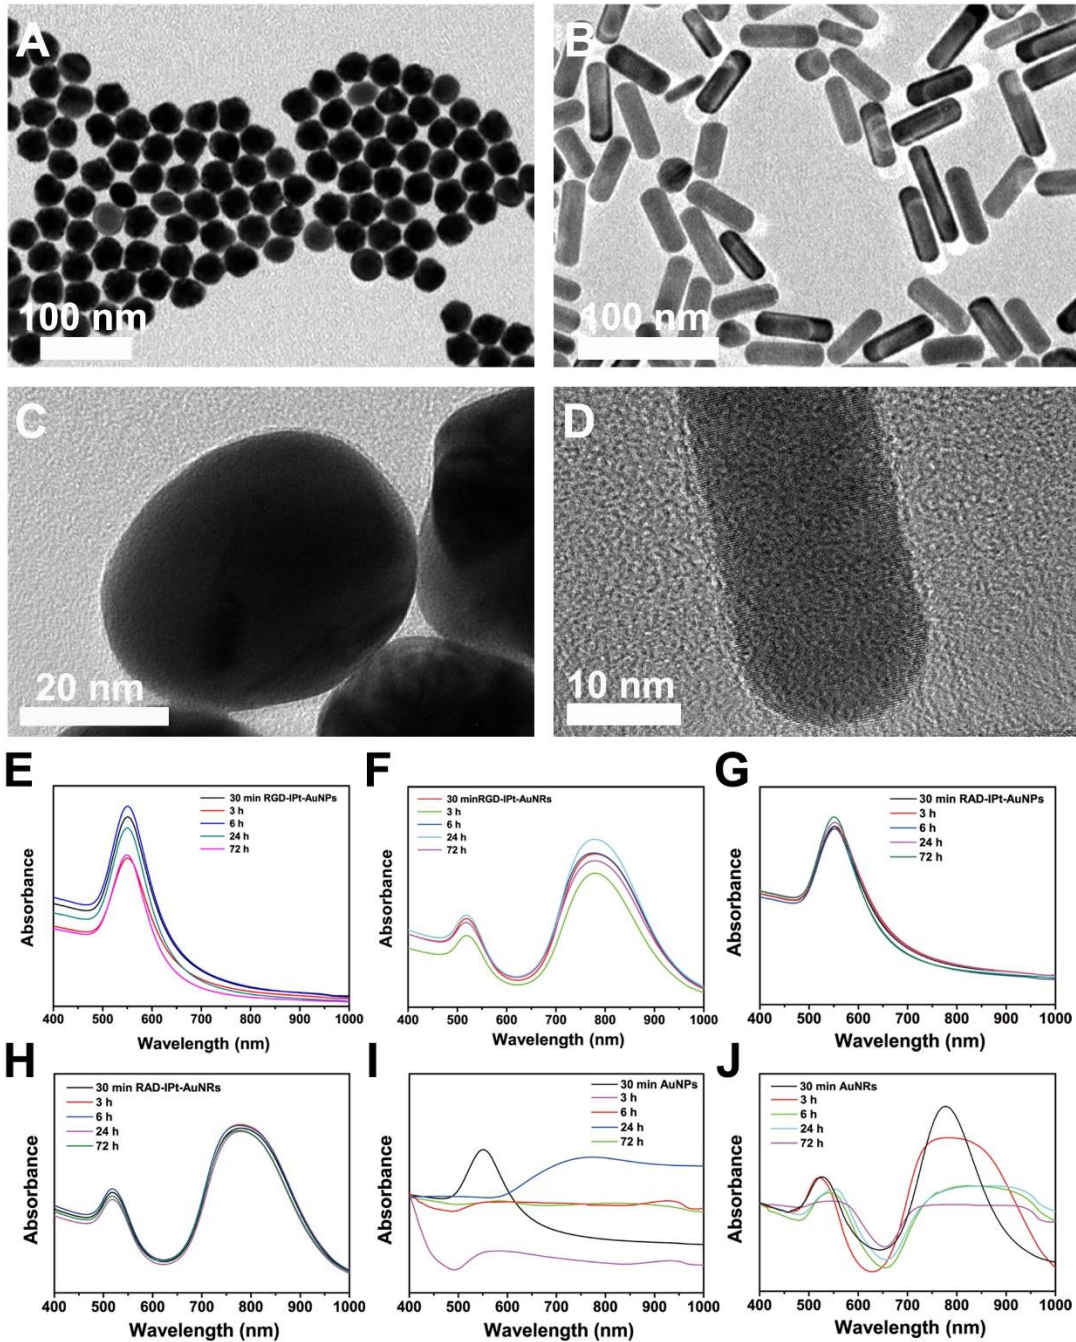

**Figure S1.** A, B: TEM images of AuNPs (A) and AuNRs (B). C, D: High resolution TEM images of RGD-IPt-AuNPs (C) and RGD-IPt-AuNRs (D). E-J: UV-vis spectra of RGD-IPt-AuNPs (E), RGD-IPt-AuNRs (F), RAD-IPt-AuNPs (G), RAD-IPt-AuNRs (H) and pristine AuNPs (I) and AuNRs (J) in RPMI-1640 with 10% FBS.

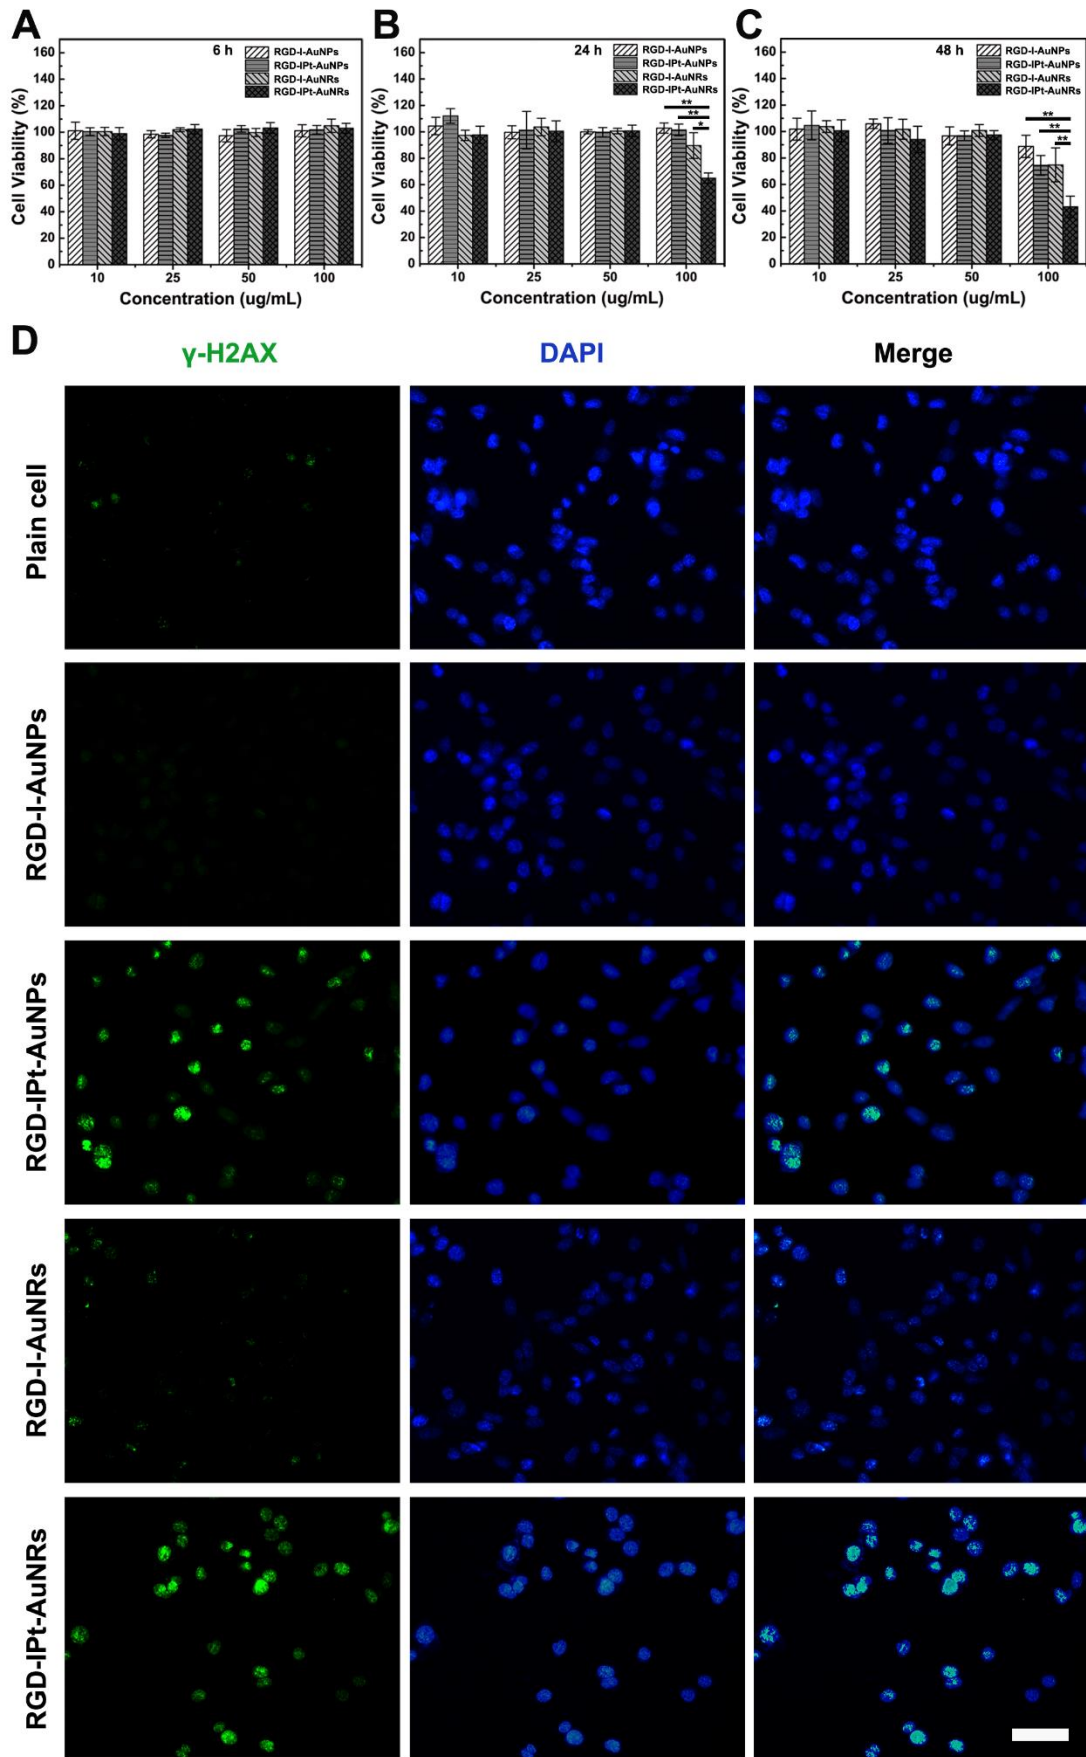

Figure S2. Chemotherapy of H1299 cells. A-C: Viability of the cells treated with the

probes at different concentrations for 6 h (A), 24 h(B) and 48 h(C). \*,  $p < 0.05$ ; \*\*,  $p < 0.01$ . D:  $\gamma$ -H2AX immunostaining of H1299 cells treated with the probes at the concentration of  $50 \mu\text{g Au/mL}$  for 48 h. Scale bar:  $20 \mu\text{m}$ .

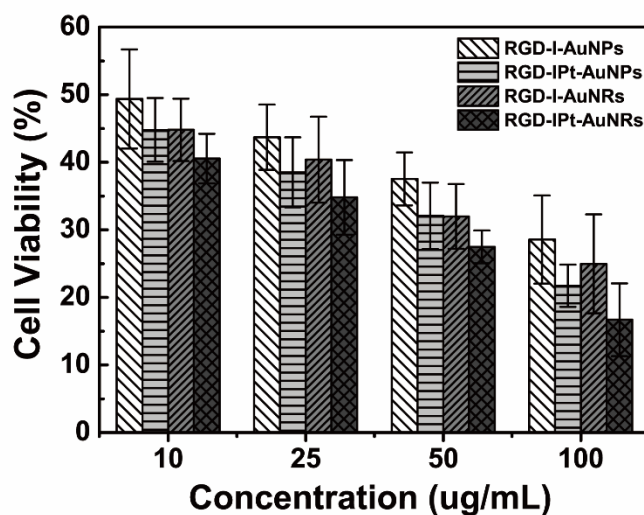

**Figure S3.** Chemo-radiotherapy of tumor cells treated with the probes at different concentrations

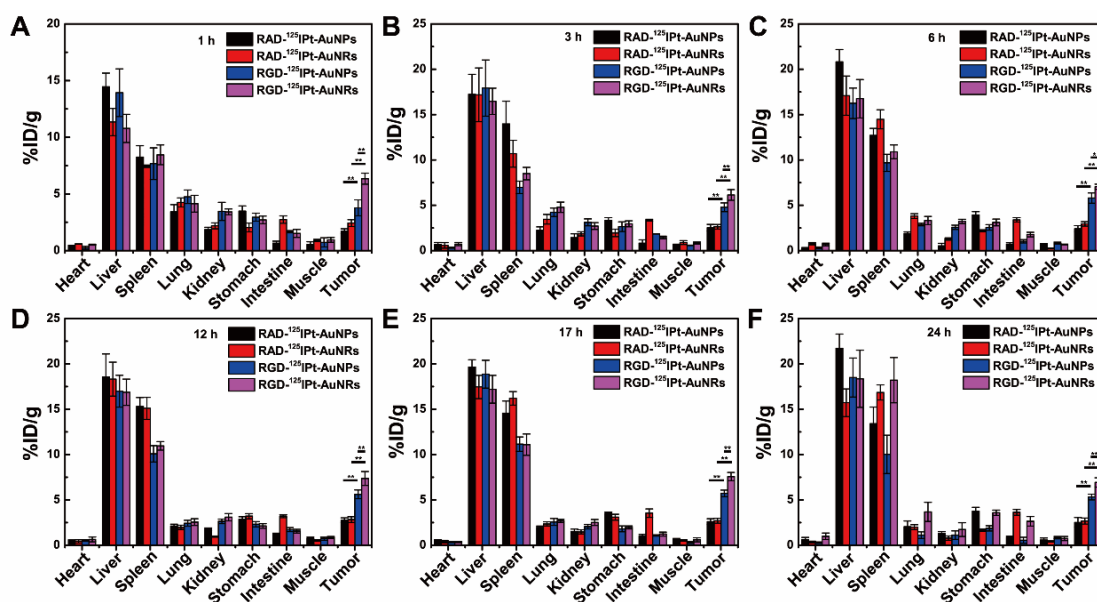

**Figure S4.** Bio-distributions of RAD or RGD probes at 1 h (A), 3 h (B), 6 h (C), 12 h(D), 17 h (E), 24 h (F) after intravenous injection. \*,  $p < 0.05$ ; \*\*,  $p < 0.01$ .

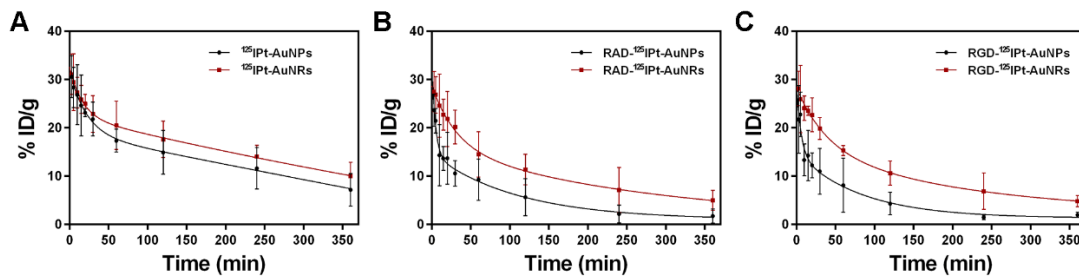

**Figure S5.** Blood elimination half-life of PEG modified Au NPs (A), RAD probes (B) and RGD probes (C).

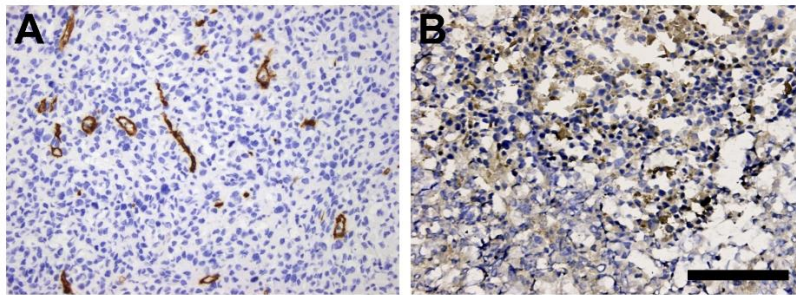

**Figure S6.** Histochemical studies of tumor tissues. A, B: Immunostaining of tumor tissues against CD31 (A) and  $\alpha v \beta 3$  integrin against CD61 (B). Scale bar = 100  $\mu\text{m}$ .

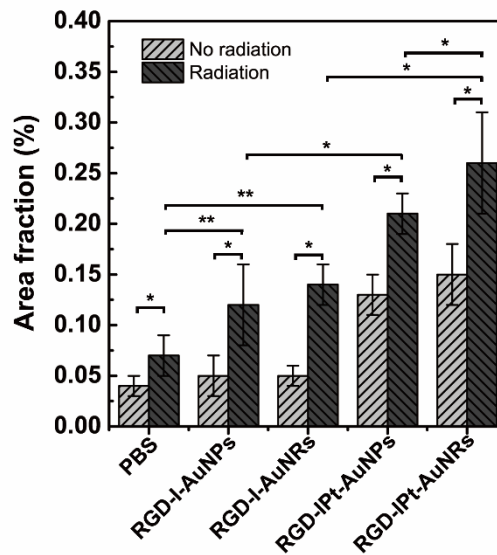

**Figure S7.** Quantifications of DNA damages in tumor tissues after treatments. Tumor tissues were stained against  $\gamma\text{-H2AX}$ . \*,  $p < 0.05$ ; \*\*,  $p < 0.01$ .

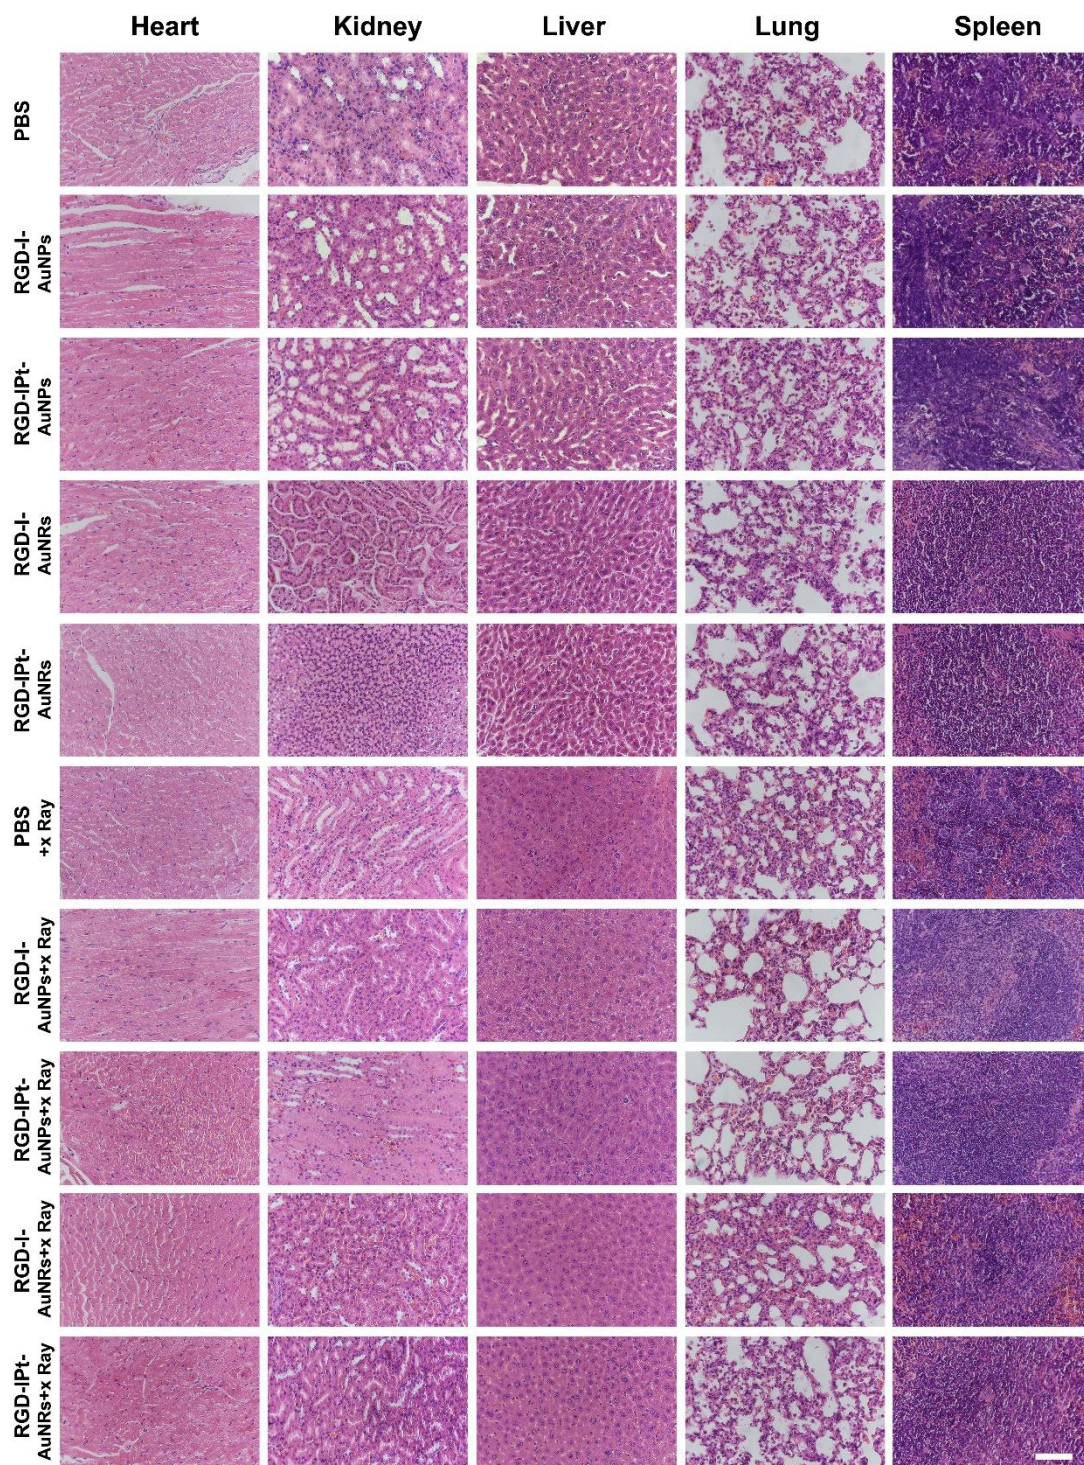

**Figure S8.** Hematoxylin/eosin staining of major organs from mice in different groups

21 days post treatments. Scale bar = 100  $\mu$ m.

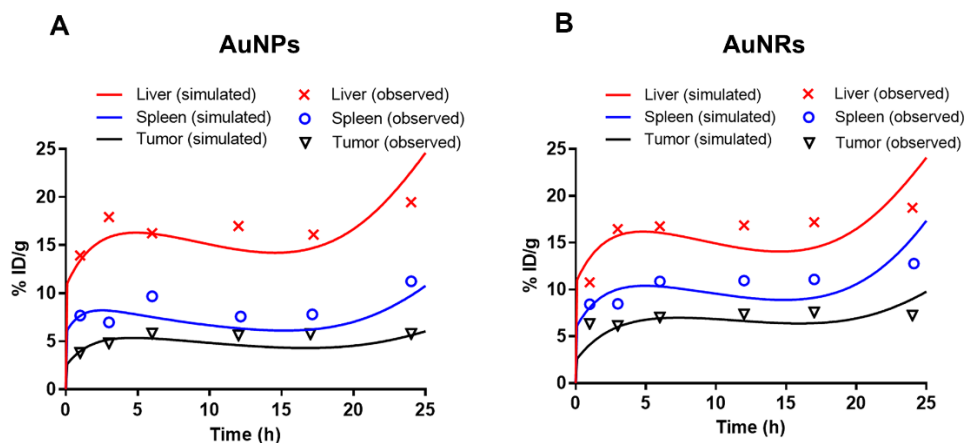

**Figure S9.** Model calibration results of RGD-<sup>125</sup>IPt-AuNPs and RGD-<sup>125</sup>IPt-AuNRs

probes in main organs of mice with experimental data. The line represents the concentration-time profile of the NPs simulated by the model.

**Table S1.** Zeta potentials of the AuNPs and AuNRs at each step of probe preparation.

| Probes         | Zeta potential<br>(mV) | Probes         | Zeta potential<br>(mV) |
|----------------|------------------------|----------------|------------------------|
| AuNPs          | -8.49 ± 2.58           | AuNRs          | 31.01 ± 4.07           |
| PDA@ AuNPs     | 24.93 ± 5.23           | PDA@AuNRs      | 22.31 ± 2.68           |
| PEG-PDA@AuNPs  | -10.23 ± 3.33          | PEG-PDA@AuNRs  | -13.67 ± 2.46          |
| RGD- IPt-AuNPs | -26.92 ± 6.17          | RGD-IPt-AuNRs  | -28.44 ± 4.36          |
| RAD- IPt-AuNPs | -20.74 ± 3.57          | RAD- IPt-AuNRs | -24.72 ± 3.39          |

**Table S2.** Parameters of AuNPs and AuNRs probes.

|                                                        | <b>RGD-IPt-AuNPs</b>  | <b>RGD-IPt-AuNRs</b>                           |
|--------------------------------------------------------|-----------------------|------------------------------------------------|
| Size ( nm )                                            | $56.37 \pm 3.04$      | $( 56.12 \pm 3.22 ) \times ( 22.41 \pm 1.01 )$ |
| Surface area ( nm <sup>2</sup> ) :                     | 9977.59               | 3945.85                                        |
| Volume of each particle ( nm <sup>3</sup> ) :          | 93739.47              | 19155.78                                       |
| Mass of each particle ( ag ) :                         | 1.81                  | 0.37                                           |
| Number of particles ( 1mg )                            | $2.86 \times 10^{12}$ | $13.99 \times 10^{12}$                         |
| Amount of PEG molecules<br>immobilized on a particle : | $128.09 \pm 14.01$    | $103.51 \pm 20.95$                             |
| Amount of RGD peptide<br>conjugated on a particle :    | $67.33 \pm 9.04$      | $61.62 \pm 2.15$                               |
| Gold content in a cell : ( pg/cell )                   | $48.86 \pm 4.32$      | $56.46 \pm 6.44$                               |

**Table S3.** Blood half-lives of different types of nanoprobes.

| <b>Probes</b>                 | <b>Blood half-lives (min)</b> |
|-------------------------------|-------------------------------|
| <sup>125</sup> IPt-AuNPs      | $124.60 \pm 12.71$            |
| <sup>125</sup> IPt-AuNRs      | $258.22 \pm 11.03$            |
| RAD- <sup>125</sup> IPt-AuNPs | $94.73 \pm 3.39$              |
| RAD- <sup>125</sup> IPt-AuNRs | $213.39 \pm 22.23$            |
| RGD- <sup>125</sup> IPt-AuNPs | $79.99 \pm 4.39$              |
| RGD- <sup>125</sup> IPt-AuNRs | $227.36 \pm 28.91$            |



**Table S4.** Parameters of two compartment modelling of blood half-lives.

| Parameter          | Unit                  | Value (RGD- IPT-AuNPs) | Value (RGD- IPT-AuNRs) |
|--------------------|-----------------------|------------------------|------------------------|
| k10                | 1/min                 | 0.01744487             | 0.005375791            |
| k12                | 1/min                 | 0.070672609            | 0.008069912            |
| k21                | 1/min                 | 0.078413326            | 0.013571193            |
| t <sub>1/2</sub> α | min                   | 4.390737262            | 28.9127711             |
| t <sub>1/2</sub> β | min                   | 79.99371624            | 227.7722557            |
| C <sub>0</sub>     | %/ml                  | 29.23989983            | 28.32567533            |
| V                  | (%)/(%/ml)            | 3.419984356            | 3.530365961            |
| CL                 | (%)/(%/ml)/min        | 0.059661181            | 0.018978508            |
| V2                 | (%)/(%/ml)            | 3.082374277            | 2.099280693            |
| CL2                | (%)/(%/ml)/min        | 0.241699218            | 0.028489744            |
| AUC 0-t            | %/ml*min              | 1606.432604            | 3703.574985            |
| AUC 0-inf          | %/ml*min              | 1676.13176             | 5269.118038            |
| AUMC               | %/ml*min <sup>2</sup> | 182678.4128            | 1562992.854            |
| MRT                | min                   | 108.9880982            | 296.6327273            |
| V <sub>ss</sub>    | %(%/ml)               | 6.502358633            | 5.629646654            |

**Table S5.** Parameters derived from PBPK modelling.

| Parameters                                                              | RGD- <sup>125</sup> Ipt-Au<br>NPs | RGD- <sup>125</sup> Ipt-A<br>uNRs | RAD- <sup>125</sup> Ipt-<br>AuNPs | RAD- <sup>125</sup> Ipt-Au<br>NRs | Organs          |
|-------------------------------------------------------------------------|-----------------------------------|-----------------------------------|-----------------------------------|-----------------------------------|-----------------|
| Distribution<br>coefficients (P)                                        | 0.15                              | 0.15                              | 0.15                              | 0.15                              | Lung            |
|                                                                         | 0.50                              | 0.50                              | 0.50                              | 0.50                              | Liver           |
|                                                                         | 0.15                              | 0.30                              | 0.15                              | 0.30                              | Spleen          |
|                                                                         | 0.01                              | 0.01                              | 0.01                              | 0.01                              | Kidneys         |
|                                                                         | 0.15                              | 0.25                              | 0.15                              | 0.25                              | Tumor           |
|                                                                         | 0.15                              | 0.15                              | 0.15                              | 0.15                              | Rest of<br>body |
| Distribution<br>limitation<br>coefficients<br>constants (PA)            | 0.001                             | 0.001                             | 0.001                             | 0.001                             | Lung            |
|                                                                         | 0.001                             | 0.001                             | 0.001                             | 0.001                             | Liver           |
|                                                                         | 0.001                             | 0.001                             | 0.001                             | 0.001                             | Spleen          |
|                                                                         | 0.0001                            | 0.0001                            | 0.0001                            | 0.0001                            | Kidneys         |
|                                                                         | 0.001                             | 0.001                             | 0.001                             | 0.001                             | Tumor           |
|                                                                         | 0.00001                           | 0.00001                           | 0.00001                           | 0.00001                           | Rest of<br>body |
| Maximum<br>uptake rate<br>constant<br>(K <sub>up</sub> <sub>max</sub> ) | 0.075                             | 0.075                             | 0.075                             | 0.075                             | Lung            |
|                                                                         | 30                                | 30                                | 30                                | 30                                | Liver           |
|                                                                         | 30                                | 60                                | 30                                | 60                                | Spleen          |
|                                                                         | 0.005                             | 0.005                             | 0.005                             | 0.005                             | Kidneys         |
|                                                                         | 10                                | 20                                | 10                                | 20                                | Tumor           |
|                                                                         | 0.2                               | 0.2                               | 0.2                               | 0.2                               | Rest of<br>body |
| Out organ rate<br>constant (K <sub>out</sub> )                          | 0.003                             | 0.003                             | 0.003                             | 0.003                             | Lung            |
|                                                                         | 0.001                             | 0.001                             | 0.001                             | 0.001                             | Liver           |
|                                                                         | 0.001                             | 0.001                             | 0.001                             | 0.001                             | Spleen          |
|                                                                         | 0.0004                            | 0.0004                            | 0.0004                            | 0.0004                            | Kidneys         |
|                                                                         | 0.001                             | 0.001                             | 0.001                             | 0.001                             | Tumor           |
|                                                                         | 0.0001                            | 0.0001                            | 0.0001                            | 0.0001                            | Rest of<br>body |
