# Supplementary material for: Tumor Chemo-Radiotherapy with Rod-Shaped and Spherical Gold Nano Probes: Shape and Active Targeting Both Matter
Source: PubMed Central journal article supplement — Theranostics. 2019 Mar 16;9(7):1893–908. doi: 10.7150/thno.30523 (PMC6485290; doi:10.7150/thno.30523), 2019-03-16
Supplement: thnov09p1893s2.pdf [file thnov09p1893s2.pdf]

## Code for RGD-<sup>125</sup>Ipt-AuNPs

STARTTIME= 0

STOPTIME=30

DTMAX = 0.1

DTOUT =0.1

; Physiological constants (kg)

BW = 0.02 ; body weight

; Dose (% ID)

IV = 0.1

; Organ volumes (fraction of body weight)

VLuC=0.007 ; Lung; Brown et al, 1997

VLC=0.0549 ; Liver; Brown et al, 1997

VSC=0.005 ; Spleen; Davies and Morris 1993

VKC=0.0167 ; Kidneys; Brown et al. 1997

VTC=0.015 ; Tumor; Baxter et al. 1994

VBloodC=0.085 ; Blood; Davies and Morris 1993

VBoC=1-(VLC+VKC+VSC+ VTC+VBloodC) ; Rest of body

; Organ volumes (L)

VBlood=VBloodC\*BW

VLu=VLuC\*BW ; Lung

VL=VLC\*BW ; Liver

VS=VSC\*BW ; Spleen

VK=VKC\*BW ; Kidneys

VT=VTC\*BW ; Tumor

VA = 0.2\*VBloodC\*BW ; Arterial blood

VV = 0.8\*VBloodC\*BW ; Venous blood

VBo=VBoC\*BW ; Rest of body

; Organ blood volumes (L)

$V_{LuVES} = 0.5 \cdot V_{Lu}$  ; Lung; Brown et al, 1997  
 $V_{LVES} = 0.31 \cdot V_L$  ; Liver; Brown et al, 1997  
 $V_{SVES} = 0.17 \cdot V_S$  ; Spleen; Brown et al, 1997  
 $V_{KVES} = 0.24 \cdot V_K$  ; Kidneys; Brown et al, 1997  
 $V_{TVES} = 0.07 \cdot V_T$  ; Tumor; Baxter et al. 1994  
 $V_{BoVES} = 0.04 \cdot V_{Bo}$  ; Rest of body; Lin et al, 2015; Brown et al, 1997

; Organ tissue volumes (L)

$V_{LuT} = 0.5 \cdot V_{Lu}$  ; Lung; Calculated from Davda et al, 2008  
 $V_{LT} = 0.69 \cdot V_L$  ; Liver; Calculated from Davda et al, 2008  
 $V_{ST} = 0.83 \cdot V_S$  ; Spleen; Calculated from Davda et al, 2008  
 $V_{KT} = 0.76 \cdot V_K$  ; Kidneys; Calculated from Davda et al, 2008  
 $V_{TT} = 0.93 \cdot V_T$  ; Tumor; Baxter et al. 1994  
 $V_{BoT} = 0.96 \cdot V_{Bo}$  ; Rest of body; Calculated from Davda et al, 2008

; Blood flow rate (fraction of cardiac output)

$QCC=16.5$  ; Cardiac output constant; Brown et al, 1997  
 $QLC=0.161$  ; Liver; Brown et al, 1997.  
 $QKC=0.091$  ; Kidney; Brown et al, 1997  
 $QSC=0.01125$  ; Spleen; Lin et al, 2015; Davies and Morris, 1993  
 $QTC=0.0225$  ; Tumor; Brown et al, 1997  
 $QBoC=1-(QLC+QSC+QKC+ QTC)$  ; Rest of body

; Cardiac output and regional blood flow (L/h)

$QC=QCC \cdot BW^{0.75}$   
 $Q_{Lu}=QC$  ; Lung  
 $Q_L=QLC \cdot QC$  ; Liver  
 $Q_S=QSC \cdot QC$  ; Spleen  
 $Q_K=QKC \cdot QC$  ; Kidneys

$QT=QTC*QC$  ; Tumor  
 $QBo=QBoC*QC$  ; Rest of body

; Distribution coefficients (PC), unitless

$PLu = 0.15$  ; Lung  
 $PL = 0.50$  ; Liver  
 $PS = 0.15$  ; Spleen  
 $PK = 0.01$  ; Kidneys  
 $PT = 0.15$  ; Tumor  
 $PBo = 0.15$  ; Rest of body

; Diffusion limitation coefficient constants, unitless

$PALuC = 0.001$  ; Lung  
 $PALC = 0.001$  ; Liver  
 $PASC = 0.001$  ; Spleen  
 $PAKC = 0.0001$  ; Kidneys  
 $PATC = 0.001$  ; Tumor  
 $PABoC = 0.00001$  ; Rest of body

; Permeability coefficient-surface area cross-product

$PALu = PALuC*QLu$  ; Lung  
 $PAL = PALC*QL$  ; Liver  
 $PAS = PASC*QS$  ; Spleen  
 $PAK = PAKC*QK$  ; Kidneys  
 $PAT = PATC*QT$  ; Tumor  
 $PABo = PABoC*QBo$  ; Rest of body

; Endocytosis-related parameters; Lu, L, K, S, and Bo represent the lung, liver, kidneys, tumor, and rest of body, respectively

$KupLumax=0.075$   
 $KupLu50=24$   
 $KupLun=5$   
 $KoutLu=0.003$

$$\text{KupLu} = ((\text{KupLumax} * \text{time}^{\text{KupLun}}) / (\text{KupLu50}^{\text{KupLun}} + \text{time}^{\text{KupLun}}))$$

$$\text{KupLmax} = 30$$

$$\text{KupL50} = 48$$

$$\text{KupLn} = 5$$

$$\text{KoutL} = 0.001$$

$$\text{KupL} = ((\text{KupLmax} * \text{time}^{\text{KupLn}}) / (\text{KupL50}^{\text{KupLn}} + \text{time}^{\text{KupLn}}))$$

$$\text{KupSmax} = 30$$

$$\text{KupS50} = 48$$

$$\text{KupSn} = 5$$

$$\text{KoutS} = 0.001$$

$$\text{KupS} = ((\text{KupSmax} * \text{time}^{\text{KupSn}}) / (\text{KupS50}^{\text{KupSn}} + \text{time}^{\text{KupSn}}))$$

$$\text{KupKmax} = 0.005$$

$$\text{KupK50} = 48$$

$$\text{KupKn} = 5$$

$$\text{KoutK} = 0.0004$$

$$\text{KupK} = ((\text{KupKmax} * \text{time}^{\text{KupKn}}) / (\text{KupK50}^{\text{KupKn}} + \text{time}^{\text{KupKn}}))$$

$$\text{KupTmax} = 10$$

$$\text{KupT50} = 36$$

$$\text{KupTn} = 5$$

$$\text{KoutT} = 0.001$$

$$\text{KupT} = ((\text{KupTmax} * \text{time}^{\text{KupTn}}) / (\text{KupT50}^{\text{KupTn}} + \text{time}^{\text{KupTn}}))$$

$$\text{KupBomax} = 0.2$$

$$\text{KupBo50} = 24$$

$$\text{KupBon} = 5$$

$$\text{KoutBo} = 0.0001$$

$$\text{KupBo} = ((\text{KupBomax} * \text{time}^{\text{KupBon}}) / (\text{KupBo50}^{\text{KupBon}} + \text{time}^{\text{KupBon}}))$$

; Urine and biliary excretion

Kurine=0.00003

Kbile=0.00003

; Blood compartment

; Venous blood concentration

$d/dt (AV) = (QL*CVL + QS*CVL + QK*CVK + QT*CVT + QBo*CVBo) - (QC*CV)$

init AV = IV

$CV = AV/VV$

; Arterial blood concentration

$d/dt (AA) = QC*(CVLu - CA)$

init AA = 0

$CA = AA/VA$

; Lung compartment; VES, T and RES represent blood vessels, tissue, and phagocytic cells

$d/dt (ALuVES) = QLu*(CV - CVLu) - PALu*CVLu + (PALu*CLuT)/PLu$

init ALuVES = 0

$CVLu = ALuVES/VLuVES$

$d/dt (ALuT) = PALu*CVLu - (PALu*CLuT)/PLu + KoutLu *ALuRES - KupLu *ALuVES$

init ALuT = 0

$CLuT = ALuT/VLuT$

$d/dt (ALuRES) = KupLu *ALuVES - KoutLu *ALuRES$

init ALuRES = 0

$CLung = (ALuVES + ALuT + ALuRES)/VLu$

; Liver compartment

$d/dt (ALVES) = QL*CA + QS*CVS - (QL + QS)*CVL - PAL*CVL + (PAL*CLT)/PL + KoutL *ALRES - KupL *ALVES - Kbile*CVL$

init ALVES = 0

$CVL = ALVES/VLVES$

$$d/dt (\text{Abile}) = \text{Kbile} * \text{CVL}$$

$$\text{init Abile} = 0$$

$$d/dt (\text{ALT}) = \text{PAL} * \text{CVL} - (\text{PAL} * \text{CLT}) / \text{PL}$$

$$\text{init ALT} = 0$$

$$\text{CLT} = \text{ALT} / \text{VLT}$$

$$d/dt (\text{ALRES}) = \text{KupL} * \text{ALVES} - \text{KoutL} * \text{ALRES}$$

$$\text{init ALRES} = 0$$

$$\text{CLiver} = (\text{ALVES} + \text{ALT} + \text{ALRES}) / \text{VL}$$

; Spleen compartment

$$d/dt (\text{ASVES}) = \text{QS} * (\text{CA} - \text{CVS}) - \text{PAS} * \text{CVS} + (\text{PAS} * \text{CST}) / \text{PS}$$

$$\text{init ASVES} = 0$$

$$\text{CVS} = \text{ASVES} / \text{VSVES}$$

$$d/dt (\text{AST}) = \text{PAS} * \text{CVS} - (\text{PAS} * \text{CST}) / \text{PS} + \text{KoutS} * \text{ASRES} - \text{KupS} * \text{ASVES}$$

$$\text{init AST} = 0$$

$$\text{CST} = \text{AST} / \text{VST}$$

$$d/dt (\text{ASRES}) = \text{KupS} * \text{ASVES} - \text{KoutS} * \text{ASRES}$$

$$\text{init ASRES} = 0$$

$$\text{CSpleen} = (\text{ASVES} + \text{AST} + \text{ASRES}) / \text{VS}$$

; Kidney compartment

$$d/dt (\text{AKVES}) = \text{QK} * (\text{CA} - \text{CVK}) - \text{PAK} * \text{CVK} + (\text{PAK} * \text{CKT}) / \text{PK} - \text{Kurine} * \text{CVK}$$

$$\text{init AKVES} = 0$$

$$\text{CVK} = \text{AKVES} / \text{VKVES}$$

$$d/dt (\text{Aurine}) = \text{Kurine} * \text{CVK}$$

$$\text{init Aurine} = 0$$

$$d/dt (AKT) = PAK*CVK - (PAK*CKT)/PK + KoutK *AKRES - KupK *AKVES$$

$$\text{init AKT} = 0$$

$$CKT = AKT/VKT$$

$$d/dt (AKRES) = KupK *AKVES - KoutK *AKRES$$

$$\text{init AKRES} = 0$$

$$CKidney = (AKVES+AKT+AKRES)/VK$$

; Tumor compartment

$$d/dt (ATVES) = QT*(CA-CVT) - PAT*CVT + (PAT*CTT)/PT - Kurine*CVT$$

$$\text{init ATVES} = 0$$

$$CVT = ATVES/VTVES$$

$$d/dt (ATT) = PAT*CVT - (PAT*CTT)/PT + KoutT *ATRES - KupT *ATVES$$

$$\text{init ATT} = 0$$

$$CTT = ATT/VT$$

$$d/dt (ATRES) = KupT *ATVES - KoutT *ATRES$$

$$\text{init ATRES} = 0$$

$$CTumor = (ATVES+ATT+ATRES)/VT$$

; Rest of body compartment

$$d/dt (ABoVES) = QBo*(CA-CVBo) - PABo*CVBo + (PABo*CBoT)/PBo$$

$$\text{init ABoVES} = 0$$

$$CVBo = ABoVES/VBoVES$$

$$d/dt (ABoT) = PABo*CVBo - (PABo*CBoT)/PBo + KoutBo *ABoRES - KupBo *ABoVES$$

$$\text{init ABoT} = 0$$

$$CBoT = ABoT/VBoT$$

$$d/dt (ABoRES) = KupBo *ABoVES - KoutBo *ABoRES$$

init ABoRES = 0

CBody = (ABoVES+ABoT+ABoRES)/Vbo

### References

1. Brown RP, Delp MD, Lindstedt SL, Rhomberg LR, Beliles RP. Physiological Parameter Values for Physiologically Based Pharmacokinetic Models. *Toxicol Ind Health*. 1997; 13: 407-84.
2. Davies B, Morris T. Physiological Parameters in Laboratory Animals and Humans. *Pharm Res*. 1993; 10: 1093-5.
3. Baxter LT, Zhu H, Mackensen DG, Jain RK. Physiologically Based Pharmacokinetic Model for Specific and Nonspecific Monoclonal Antibodies and Fragments in Normal Tissues and Human Tumor Xenografts in Nude Mice. *Cancer Res*. 1994; 54: 1517-28.
