# Supplementary material for: Tumor Chemo-Radiotherapy with Rod-Shaped and Spherical Gold Nano Probes: Shape and Active Targeting Both Matter
Source: PubMed Central journal article supplement — Theranostics. 2019 Mar 16;9(7):1893–908. doi: 10.7150/thno.30523 (PMC6485290; doi:10.7150/thno.30523), 2019-03-16
Supplement: thnov09p1893s3.pdf [file thnov09p1893s3.pdf]

## Code for RGD-<sup>125</sup>Ipt-AuNRs

STARTTIME= 0

STOPTIME=30

DTMAX = 0.1

DTOUT =0.1

; Physiological constants (kg)

BW = 0.02 ; body weight

; Dose (% ID)

IV = 0.1

; Organ volumes (fraction of body weight)

VLuC=0.007 ; Lung; Brown et al, 1997<sup>1</sup>

VLC=0.0549 ; Liver; Brown et al, 1997<sup>1</sup>

VSC=0.005 ; Spleen; Davies and Morris 1993<sup>2</sup>

VKC=0.0167 ; Kidneys; Brown et al. 1997<sup>1</sup>

VTC=0.015 ; Tumor; Baxter et al. 1994<sup>3</sup>

VBloodC=0.085 ; Blood; Davies and Morris 1993<sup>2</sup>

VBoC=1-(VLC+VKC+VSC+ VTC+VBloodC) ; Rest of body

; Organ volumes (L)

VBlood=VBloodC\*BW

VLu=VLuC\*BW ; Lung

VL=VLC\*BW ; Liver

VS=VSC\*BW ; Spleen

VK=VKC\*BW ; Kidneys

VT=VTC\*BW ; Tumor

VA = 0.2\*VBloodC\*BW ; Arterial blood

VV = 0.8\*VBloodC\*BW ; Venous blood

VBo=VBoC\*BW ; Rest of body

; Organ blood volumes (L)

$V_{LuVES} = 0.5 * V_{Lu}$  ; Lung; Brown et al, 1997  
 $V_{LVES} = 0.31 * V_L$  ; Liver; Brown et al, 1997  
 $V_{SVES} = 0.17 * V_S$  ; Spleen; Brown et al, 1997  
 $V_{KVES} = 0.24 * V_K$  ; Kidneys; Brown et al, 1997  
 $V_{TVES} = 0.07 * V_T$  ; Tumor; Baxter et al. 1994  
 $V_{BoVES} = 0.04 * V_{Bo}$  ; Rest of body; Lin et al, 2015; Brown et al, 1997

; Organ tissue volumes (L)

$V_{LuT} = 0.5 * V_{Lu}$  ; Lung; Calculated from Davda et al, 2008  
 $V_{LT} = 0.69 * V_L$  ; Liver; Calculated from Davda et al, 2008  
 $V_{ST} = 0.83 * V_S$  ; Spleen; Calculated from Davda et al, 2008  
 $V_{KT} = 0.76 * V_K$  ; Kidneys; Calculated from Davda et al, 2008  
 $V_{TT} = 0.93 * V_T$  ; Tumor; Baxter et al. 1994  
 $V_{BoT} = 0.96 * V_{Bo}$  ; Rest of body; Calculated from Davda et al, 2008

; Blood flow rate (fraction of cardiac output)

$Q_{CC} = 16.5$  ; Cardiac output constant; Brown et al, 1997  
 $Q_{LC} = 0.161$  ; Liver; Brown et al, 1997.  
 $Q_{KC} = 0.091$  ; Kidney; Brown et al, 1997  
 $Q_{SC} = 0.01125$  ; Spleen; Lin et al, 2015; Davies and Morris, 1993  
 $Q_{TC} = 0.0225$  ; Tumor; Brown et al, 1997  
 $Q_{BoC} = 1 - (Q_{LC} + Q_{SC} + Q_{KC} + Q_{TC})$  ; Rest of body

; Cardiac output and regional blood flow (L/h)

$QC = Q_{CC} * BW^{0.75}$   
 $Q_{Lu} = QC$  ; Lung  
 $Q_L = Q_{LC} * QC$  ; Liver  
 $Q_S = Q_{SC} * QC$  ; Spleen  
 $Q_K = Q_{KC} * QC$  ; Kidneys

$QT = QTC * QC$  ; Tumor  
 $QBo = QBoC * QC$  ; Rest of body

; Distribution coefficients (PC), unitless

$PLu = 0.15$  ; Lung  
 $PL = 0.50$  ; Liver  
 $PS = 0.30$  ; Spleen  
 $PK = 0.01$  ; Kidneys  
 $PT = 0.25$  ; Tumor  
 $PBo = 0.15$  ; Rest of body

; Diffusion limitation coefficient constants, unitless

$PALuC = 0.001$  ; Lung  
 $PALC = 0.001$  ; Liver  
 $PASC = 0.001$  ; Spleen  
 $PAKC = 0.0001$  ; Kidneys  
 $PATC = 0.001$  ; Tumor  
 $PABoC = 0.00001$  ; Rest of body

; Permeability coefficient-surface area cross-product

$PALu = PALuC * QLu$  ; Lung  
 $PAL = PALC * QL$  ; Liver  
 $PAS = PASC * QS$  ; Spleen  
 $PAK = PAKC * QK$  ; Kidneys  
 $PAT = PATC * QT$  ; Tumor  
 $PABo = PABoC * QBo$  ; Rest of body

; Endocytosis-related parameters; Lu, L, K, T, and Bo represent the lung, liver, kidneys, tumor, and rest of body, respectively

$KupLumax = 0.075$   
 $KupLu50 = 24$   
 $KupLun = 5$   
 $KoutLu = 0.003$

$$\text{KupLu} = ((\text{KupLumax} * \text{time}^{\text{KupLun}}) / (\text{KupLu50}^{\text{KupLun}} + \text{time}^{\text{KupLun}}))$$

$$\text{KupLmax} = 30$$

$$\text{KupL50} = 48$$

$$\text{KupLn} = 5$$

$$\text{KoutL} = 0.001$$

$$\text{KupL} = ((\text{KupLmax} * \text{time}^{\text{KupLn}}) / (\text{KupL50}^{\text{KupLn}} + \text{time}^{\text{KupLn}}))$$

$$\text{KupSmax} = 60$$

$$\text{KupS50} = 48$$

$$\text{KupSn} = 5$$

$$\text{KoutS} = 0.001$$

$$\text{KupS} = ((\text{KupSmax} * \text{time}^{\text{KupSn}}) / (\text{KupS50}^{\text{KupSn}} + \text{time}^{\text{KupSn}}))$$

$$\text{KupKmax} = 0.005$$

$$\text{KupK50} = 48$$

$$\text{KupKn} = 5$$

$$\text{KoutK} = 0.0004$$

$$\text{KupK} = ((\text{KupKmax} * \text{time}^{\text{KupKn}}) / (\text{KupK50}^{\text{KupKn}} + \text{time}^{\text{KupKn}}))$$

$$\text{KupTmax} = 20$$

$$\text{KupT50} = 36$$

$$\text{KupTn} = 5$$

$$\text{KoutT} = 0.001$$

$$\text{KupT} = ((\text{KupTmax} * \text{time}^{\text{KupTn}}) / (\text{KupT50}^{\text{KupTn}} + \text{time}^{\text{KupTn}}))$$

$$\text{KupBomax} = 0.2$$

$$\text{KupBo50} = 24$$

$$\text{KupBon} = 5$$

$$\text{KoutBo} = 0.0001$$

$$\text{KupBo} = ((\text{KupBomax} * \text{time}^{\text{KupBon}}) / (\text{KupBo50}^{\text{KupBon}} + \text{time}^{\text{KupBon}}))$$

; Urine and biliary excretion

$$K_{urine}=0.00003$$

$$K_{bile}=0.00003$$

; Blood compartment

; Venous blood concentration

$$d/dt (AV) = (Q_L * CV_L + Q_S * CV_L + Q_K * CV_K + Q_T * CV_T + Q_{Bo} * CV_{Bo}) - (Q_C * CV)$$

$$\text{init } AV = IV$$

$$CV = AV/VV$$

; Arterial blood concentration

$$d/dt (AA) = Q_C * (CV_Lu - CA)$$

$$\text{init } AA = 0$$

$$CA = AA/VA$$

; Lung compartment; VES, T and RES represent blood vessels, tissue, and phagocytic cells

$$d/dt (ALuVES) = Q_{Lu} * (CV - CV_{Lu}) - P_{Lu} * CV_{Lu} + (P_{Lu} * CLuT) / P_{Lu}$$

$$\text{init } ALuVES = 0$$

$$CV_{Lu} = ALuVES / V_{LuVES}$$

$$d/dt (ALuT) = P_{Lu} * CV_{Lu} - (P_{Lu} * CLuT) / P_{Lu} + K_{outLu} * ALuRES - K_{upLu} * ALuVES$$

$$\text{init } ALuT = 0$$

$$CLuT = ALuT / V_{LuT}$$

$$d/dt (ALuRES) = K_{upLu} * ALuVES - K_{outLu} * ALuRES$$

$$\text{init } ALuRES = 0$$

$$CLung = (ALuVES + ALuT + ALuRES) / V_{Lu}$$

; Liver compartment

$$d/dt (ALVES) = Q_L * CA + Q_S * CV_S - (Q_L + Q_S) * CV_L - P_{AL} * CV_L + (P_{AL} * CLT) / P_L + K_{outL} * ALRES - K_{upL} * ALVES - K_{bile} * CV_L$$

$$\text{init } ALVES = 0$$

$$CV_L = ALVES / V_{LVES}$$

$$d/dt (Abile) = Kbile*CVL$$

$$\text{init Abile} = 0$$

$$d/dt (ALT) = PAL*CVL - (PAL*CLT)/PL$$

$$\text{init ALT} = 0$$

$$CLT = ALT/VLT$$

$$d/dt (ALRES) = KupL *ALVES - KoutL *ALRES$$

$$\text{init ALRES} = 0$$

$$CLiver = (ALVES+ALT+ALRES)/VL$$

; Spleen compartment

$$d/dt (ASVES) = QS*(CA-CVS) - PAS*CVS + (PAS*CST)/PS$$

$$\text{init ASVES} = 0$$

$$CVS = ASVES/VSVES$$

$$d/dt (AST) = PAS*CVS - (PAS*CST)/PS + KoutS *ASRES - KupS *ASVES$$

$$\text{init AST} = 0$$

$$CST = AST/VST$$

$$d/dt (ASRES) = KupS *ASVES - KoutS *ASRES$$

$$\text{init ASRES} = 0$$

$$CSpleen = (ASVES+AST+ASRES)/VS$$

; Kidney compartment

$$d/dt (AKVES) = QK*(CA-CVK) - PAK*CVK + (PAK*CKT)/PK - Kurine*CVK$$

$$\text{init AKVES} = 0$$

$$CVK = AKVES/VKVES$$

$$d/dt (Aurine) = Kurine*CVK$$

$$\text{init Aurine} = 0$$

$$d/dt (AKT) = PAK*CVK - (PAK*CKT)/PK + KoutK *AKRES - KupK *AKVES$$

$$\text{init AKT} = 0$$

$$CKT = AKT/VKT$$

$$d/dt (AKRES) = KupK *AKVES - KoutK *AKRES$$

$$\text{init AKRES} = 0$$

$$CKidney = (AKVES+AKT+AKRES)/VK$$

; Tumor compartment

$$d/dt (ATVES) = QT*(CA-CVT) - PAT*CVT + (PAT*CTT)/PT - Kurine*CVT$$

$$\text{init ATVES} = 0$$

$$CVT = ATVES/VTVES$$

$$d/dt (ATT) = PAT*CVT - (PAT*CTT)/PT + KoutT *ATRES - KupT *ATVES$$

$$\text{init ATT} = 0$$

$$CTT = ATT/VTT$$

$$d/dt (ATRES) = KupT *ATVES - KoutT *ATRES$$

$$\text{init ATRES} = 0$$

$$CTumor = (ATVES+ATT+ATRES)/VT$$

; Rest of body compartment

$$d/dt (ABoVES) = QBo*(CA-CVBo) - PABo*CVBo + (PABo*CBoT)/PBo$$

$$\text{init ABoVES} = 0$$

$$CVBo = ABoVES/VBoVES$$

$$d/dt (ABoT) = PABo*CVBo - (PABo*CBoT)/PBo + KoutBo *ABoRES - KupBo *ABoVES$$

$$\text{init ABoT} = 0$$

$$CBoT = ABoT/VBoT$$

$$d/dt (ABoRES) = KupBo *ABoVES - KoutBo *ABoRES$$

init ABoRES = 0

CBody = (ABoVES+ABoT+ABoRES)/Vbo

### References

1. Brown RP, Delp MD, Lindstedt SL, Rhomberg LR, Beliles RP. Physiological Parameter Values for Physiologically Based Pharmacokinetic Models. *Toxicol Ind Health*. 1997; 13: 407-84.
2. Davies B, Morris T. Physiological Parameters in Laboratory Animals and Humans. *Pharm Res*. 1993; 10: 1093-5.
3. Baxter LT, Zhu H, Mackensen DG, Jain RK. Physiologically Based Pharmacokinetic Model for Specific and Nonspecific Monoclonal Antibodies and Fragments in Normal Tissues and Human Tumor Xenografts in Nude Mice. *Cancer Res*. 1994; 54: 1517-28.
